# Supplementary material for: Short sleep duration is associated with inadequate hydration: cross-cultural evidence from US and Chinese adults
Source: Oxford University Press journal article supplement (doi:10.1093/sleep/zsy210), 2018-11-04
Supplement: zsy210_suppl_supplemental_tables.docx [file zsy210_suppl_supplemental_tables.docx]

**Short sleep duration is associated with inadequate hydration: Cross-cultural evidence from US and Chinese adults**

**Supplemental Material**

**Authors:** Asher Y. Rosinger1,2,*, Anne-Marie Chang1, Orfeu Buxton1,3, Junjuan Li4, Shouling Wu5, Xiang Gao6,

1Department of Biobehavioral Health, Pennsylvania State University, State College, PA.

2Department of Anthropology, Pennsylvania State University, State College, PA.

3Division of Sleep Medicine, Harvard Medical School, Harvard University, Cambridge, MA

4Department of Nephrology,Kailuan General Hospital, Tangshan 063000, China.

5Department of Cardiology, Kailuan Hospital, Tangshan 063000, China

6Department of Nutrition, Pennsylvania State University, State College, PA.

*Corresponding Author:

Asher Y. Rosinger, PhD, MPH

The Pennsylvania State University

219 Biobehavioral Health Building

University Park, PA 16802

Email: [arosinger@psu.edu](mailto:arosinger@psu.edu)

Phone: 814-865-5220

Supplemental Table 1: Relationship between sleep duration on urine specific gravity and odds of inadequate hydration (Usg >1.020 g/ml) among US adults, NHANES 2007-2008.

|  | (1) | (2) | (3) | (4) |
| --- | --- | --- | --- | --- |
|  | Beta (SE) | Beta (SE) | Odds Ratio (95% CI) | Odds Ratio (95% CI) |
| VARIABLES | Usga,d (g/ml) | Usgb,d (g/ml) | inadequate hydrationa,c,d | inadequate hydrationb-d |
| Sleep |  |  |  |  |
| <5 hours sleep | 0.0006 | 0.0005 | 1.16 | 1.13 |
|  | (0.0005) | (0.0006) | (0.75 - 1.79) | (0.73 - 1.75) |
| 5-6 hours sleep | 0.0005* | 0.0006** | 1.17** | 1.17** |
|  | (0.0003) | (0.0003) | (1.04 - 1.32) | (1.02 - 1.35) |
| 7-8 hours sleep | Ref | Ref | 1 | 1 |
|  |  |  |  |  |
| ≥9 hours sleep | 0.0006 | 0.0007 | 1.06 | 1.06 |
|  | (0.0007) | (0.0007) | (0.69 - 1.65) | (0.68 - 1.67) |
|  |  |  |  |  |
| Observationse | 4,680 | 3,689 | 4,680 | 3,689 |
| R-squared | 0.17 | 0.17 |  |  |

Standard errors or 95% CI in parentheses

*** p<0.01, ** p<0.05, * p<0.1

aNot excluding adults with diabetes or diuretic use.

bExcluding adults with diabetes, diuretic use, and weak/failing kidneys.

cInadequate hydration is Usg>1.020 g/ml.

dAdjusted for age, race/Hispanic origin, sex, BMI, total water intake, alcohol intake, high caffeine intake (>400 mg), time of exam, physical activity level > 150 minutes of moderate/vigorous activity/week.

eUnweighted sample size

Supplemental Table 2: Relationship between sleep duration on urine osmolality and odds of inadequate hydration (>831 mosm/kg) among US adults, NHANES 2009–2012

|  | (1) | (2) | (3) | (4) |
| --- | --- | --- | --- | --- |
|  | Beta (SE) | Beta (SE) | Odds Ratio (95% CI) | Odds Ratio (95% CI) |
| VARIABLES | Uosma,d (Mosm/kg) | Uosmb,d (Mosm/kg) | inadequate hydrationa,c,d | inadequate hydrationb-d |
| Sleep |  |  |  |  |
| <5 hours sleep | 17.78 | 10.70 | 0.95 | 0.92 |
|  | (18.57) | (23.25) | (0.71 - 1.26) | (0.62 - 1.37) |
| 5-6 hours sleep | 16.36** | 19.63*** | 1.21*** | 1.20*** |
|  | (6.25) | (6.78) | (1.09 - 1.33) | (1.05 - 1.36) |
| 7-8 hours sleep | Ref | Ref | 1 | 1 |
|  |  |  |  |  |
| ≥9 hours sleep | 7.97 | 9.25 | 0.89 | 0.91 |
|  | (12.26) | (14.77) | (0.65 - 1.23) | (0.66 - 1.27) |
|  |  |  |  |  |
| Observations | 9,599 | 7,664 | 9,599 | 7,664 |
| R-squared | 0.15 | 0.15 |  |  |

Standard errors in parentheses

*** p<0.01, ** p<0.05, * p<0.1

aNot excluding adults with diabetes or diuretic use.

bExcluding adults with diabetes, diuretic use, and weak/failing kidneys.

cInadequate hydration is Uosm > 831 mOsm/kg.

dAdjusted for age, race/Hispanic origin, sex, BMI, total water intake, alcohol intake, high caffeine intake (>400 mg), time of exam, physical activity level > 150 minutes of moderate/vigorous activity/week.

eUnweighted sample size

Supplemental Table 3: Relationship between sleep duration on urine specific gravity and odds of inadequate hydration (>1.020 g/ml) among Chinese adults in the Kailuan Study, 2012.

|  | (1) | (2) | (3) | (4) |
| --- | --- | --- | --- | --- |
|  | Beta (SE) | Beta (SE) | Odds Ratio (95% CI) | Odds Ratio (95% CI) |
| VARIABLES | Usga,d (g/ml) | Usgb,d (g/ml) | inadequate hydrationa,c,d | inadequate hydrationb-d |
| Sleep |  |  |  |  |
| <5 hours sleep | 0.0006** | 0.0008** | 1.42*** | 1.56*** |
|  | (0.0003) | (0.0003) | (1.16 - 1.75) | (1.21 – 2.03) |
| 5-6 hours sleep | 0.0004*** | 0.0004*** | 1.28*** | 1.32*** |
|  | (0.0001) | (0.0001) | (1.18 - 1.40) | (1.20 - 1.46) |
| 7-8 hours sleep | Ref | Ref | 1 | 1 |
|  |  |  |  |  |
| ≥9 hours sleep | -0.0009* | -0.0014** | 0.76 | 0.71 |
|  | (0.0005) | (0.0006) | (0.53 - 1.09) | (0.47 - 1.09) |
|  |  |  |  |  |
| Observations | 11,903 | 8,766 | 11,903 | 8,766 |
| R-squared | 0.03 | 0.04 |  |  |

Standard errors in parentheses

*** p<0.01, ** p<0.05, * p<0.1

aNot excluding adults with diabetes or diuretic use.

bExcluding adults with diabetes, diuretic use, and weak/failing kidneys.

cInadequate hydration is Usg>1.020 g/ml.

dAdjusted for age, sex, BMI, physical activity level status, and alcohol drinking status.
